# Supplementary material
Source: publisher site journal article supplement (https://www.spandidos-publications.com/3204/downloadSupplementary)

Figure S1. TNF $\alpha$  dose-dependently activates MMP1, 3 and 13 expression in chondrocytes. Chondrocytes were treated with TNF $\alpha$  for 24 h and analyzed by (A) RT-qPCR and (B) immunoblotting. The results of qPCR did not reach statistical significance. phos, phosphorylated; MMP, matrix metalloproteinase; TNF $\alpha$ , tumor necrosis factor  $\alpha$ ; RT-qPCR, reverse transcription quantitative PCR.

**A**

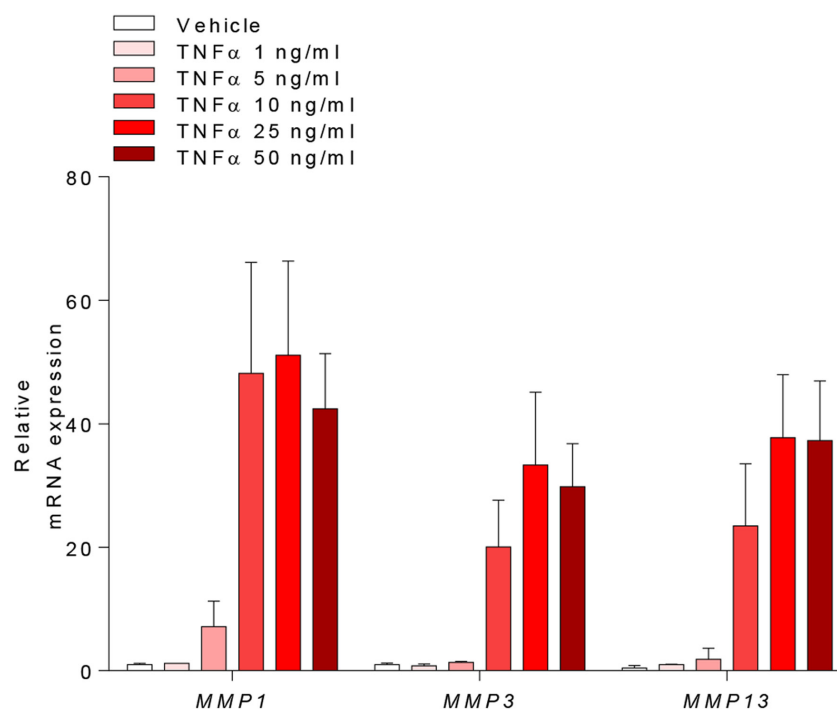

**B**

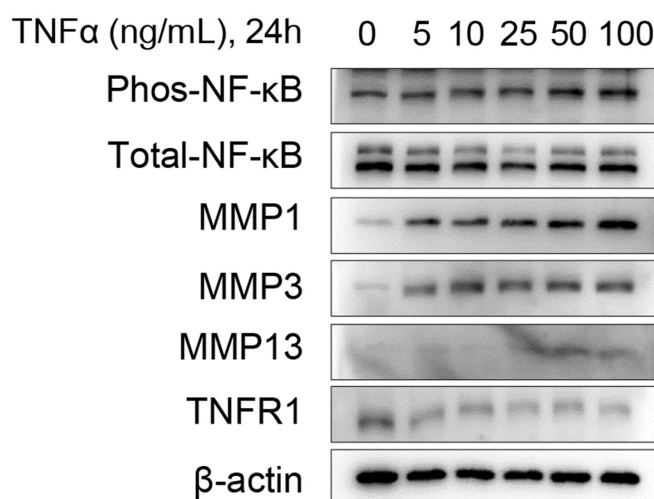

Figure S2. TNF $\alpha$  upregulates MMP1, 3 and 13, and downregulates TIMP1 and TIMP2 expression in chondrocytes. Raw images for human MMP array. Significant differences are marked in red compared with the vehicle. TIMP, TIMP metalloproteinase inhibitor; MMP, matrix metalloproteinase; TNF $\alpha$ , tumor necrosis factor  $\alpha$ .

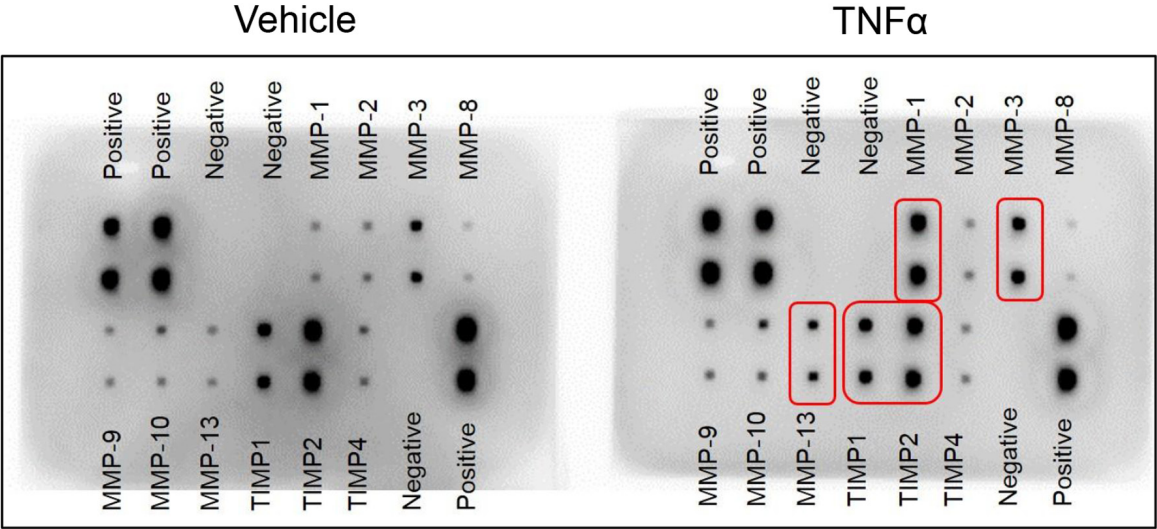

Figure S3. TNF $\alpha$  inhibits TIMP1 and TIMP2 expression in chondrocytes. Chondrocytes were treated with TNF $\alpha$  for 24 h and subjected to immunofluorescence to detect TIMP1 and TIMP2 expression. Representative images are shown. Scale bar, 50  $\mu$ m. TIMP, TIMP metalloproteinase inhibitor; TNF $\alpha$ , tumor necrosis factor  $\alpha$ .

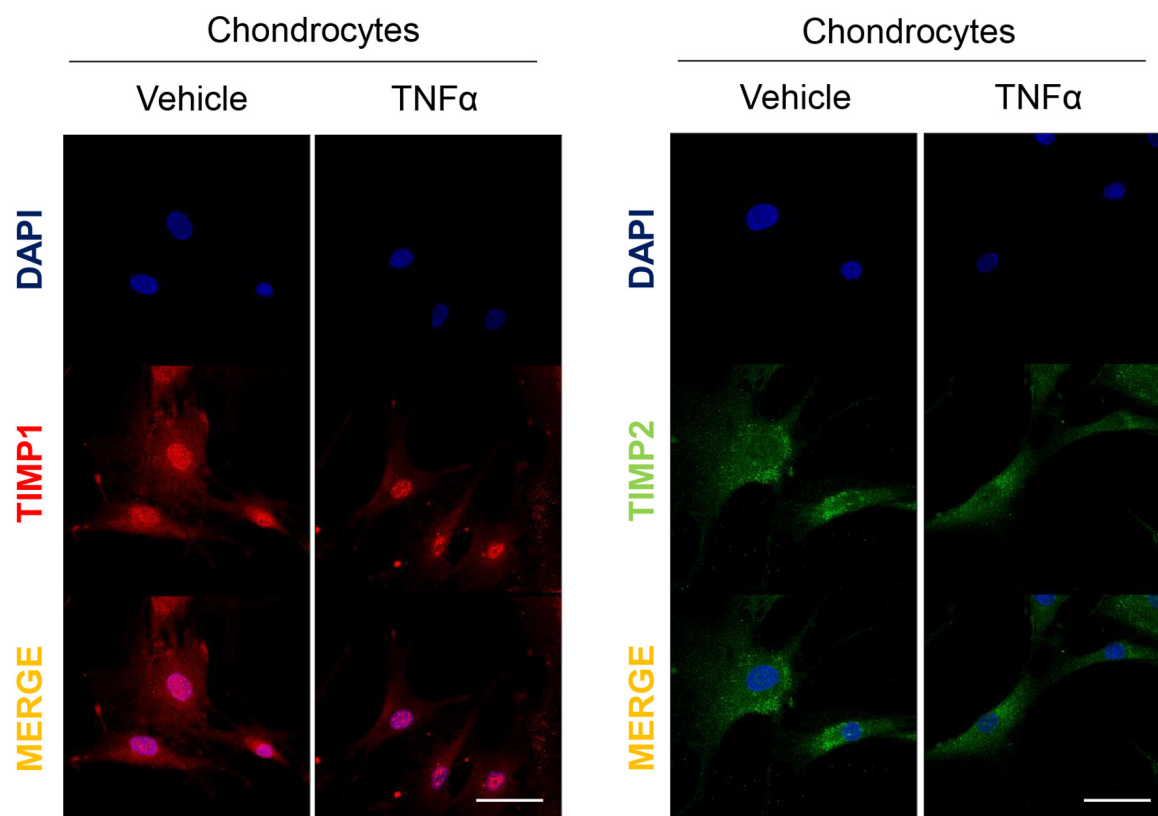

Figure S4. NF- $\kappa$ B inhibitor suppresses TNF-activated MMP expression in chondrocytes. Chondrocytes were stimulated with vehicle or TNF $\alpha$  in the presence of high- or low-dose BAY (NF- $\kappa$ B inhibitor) for 24 h and mRNA expression was analyzed by RT-qPCR. The results of RT-qPCR did not reach statistical significance. MMP, matrix metalloproteinase; TNF $\alpha$ , tumor necrosis factor  $\alpha$ ; RT-qPCR, reverse transcription-quantitative PCR.

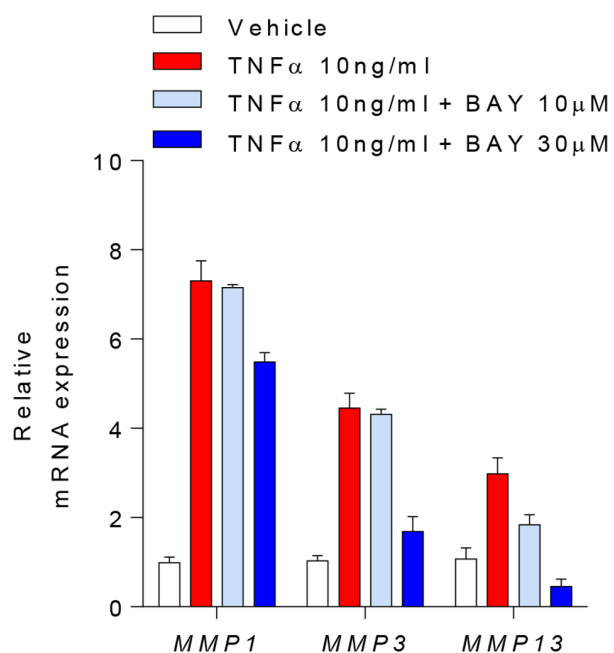

Supplement: Supplementary file 1 [file downloadSupplementary]
